# Supplementary material for: Mutational analysis of a Dcp2-binding element reveals general enhancement of decapping by 5′-end stem-loop structures
Source: PubMed Central journal article supplement — Nucleic Acids Res. 2009 Feb 20;37(7):2227–37. doi: 10.1093/nar/gkp087 (PMC2673433; doi:10.1093/nar/gkp087), 2009-02-20
Supplement: gkp087_1.pdf [file gkp087_1.pdf]

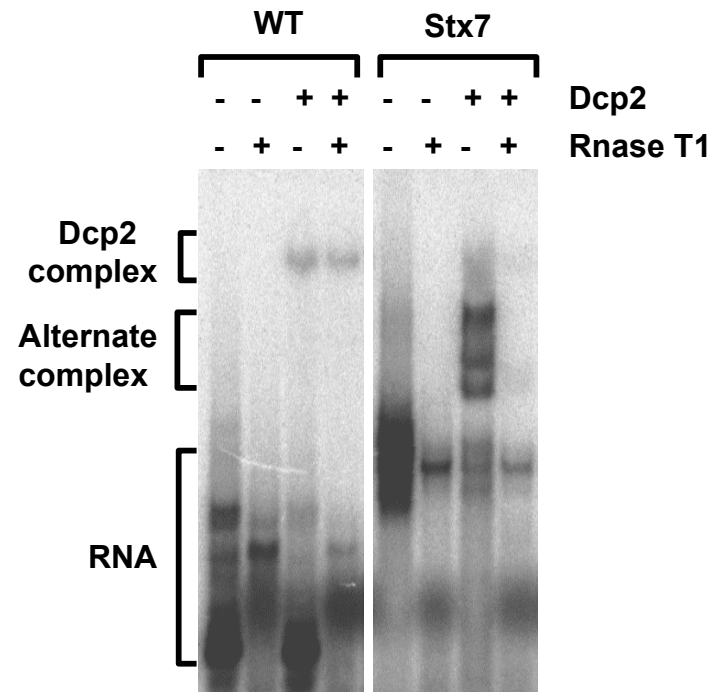

**Supplementary Figure S1. Electrophoretic mobility shift assay with 2xDE and control Stx7 RNA.** <sup>32</sup>P-uniformly labeled uncapped wild type 2xDE or the negative control Stx7 RNA (1-80nt) were incubated with 1 $\mu$ g recombinant His-Dcp2 protein for 20 min similar to that described in the legend for Figure 1B. Where indicated, the reaction was treated with 10U RNase T1 for 10 minutes prior to resolving the protein-RNA complex on a gel.
